# Supplementary material for: Role of Nox2 and p22phox in Persistent Postoperative Hypertension in Aldosterone-Producing Adenoma Patients after Adrenalectomy
Source: Hindawi journal article supplement (doi:10.1155/2016/2395634), 2016-01-01
Supplement: f1 [file 2395634.f1.pdf]

**Supplemental Table 1. Primers and annealing temperature**

| Gene    | Sequence ID | Primer sequence (5'-3')                                   | Annealing        | Size |
|---------|-------------|-----------------------------------------------------------|------------------|------|
|         |             |                                                           | Temperature (°C) | (bp) |
| Nox1    | NM_013955   | F: CACTGACATCGTGACAGGTCTGAA<br>R: CTGGAATATCGGTGACAGCATTG | 56               | 171  |
| Nox2    | NM_000397   | F: GCAATAACGCCACCAATCTGAAG<br>R: GACTCATCCCAGCCAGTGAGGTA  | 58               | 175  |
| Nox3    | NM_015718   | F: GGTTCTGGCGATTTCAACAA<br>R: AAGCCACGCTTTTTTCATGTG       | 60               | 91   |
| Nox4    | NM_016931   | F: GTATGGAAGAGCCCAGATTCC<br>R: GGTGACTGGCTTATTGCTCC       | 60               | 122  |
| Nox5    | NM_024505   | F: ACAGGAGAAGATGAACACATCTGGA<br>R: GCATCCTCCTCGGCACTCAT   | 59               | 84   |
| Doux1   | NM_017434   | F: CTGGTCTTCAAGTCATCCGTCA<br>R: TGTCAGCCAGCCACTCAAAC      | 60               | 100  |
| Doux2   | NM_014080   | F: GAGTTGGGTGACCAGCTGTCCTA<br>R: TTCAGCCTGGCTCTTGCGTA     | 62               | 135  |
| P22phox | NM_000101   | F: CAGTGGTACTTTGGTGCCTACTCC<br>R: GGTGGAGCCCTTCTTCCTCT    | 60               | 90   |
| CYP11B2 | NM_000498   | F: GGAGCAGGGTTATGAGCAC<br>R: GTGGTCCTCCCAAGTTGTAC         | -                | 89   |
| GAPDH   | NM_002046   | F: GCACCGTCAAGGCTGAGAAC<br>R: TGGTGAAGACGCCAGTGGA         | 55               | 138  |

**Table 2. Correlation analysis of biological data with Nox2 IRS, p22phox IRS, Nox2 IRS×V and p22phox IRS×V in APA**

| Variable             | R (Nox2<br>IRS) | <i>P</i><br>value | R (Nox2<br>IRS×V) | <i>P</i><br>value | R (p22phox<br>IRS) | <i>P</i><br>value | R (p22phox<br>IRS×V) | <i>P</i><br>value |
|----------------------|-----------------|-------------------|-------------------|-------------------|--------------------|-------------------|----------------------|-------------------|
| PAC                  | 0.057           | 0.770             | 0.503             | 0.005             | 0.036              | 0.853             | 0.289                | 0.128             |
| PRA                  | 0.30            | 0.878             | 0.104             | 0.590             | -0.107             | 0.582             | -0.125               | 0.517             |
| ARR                  | 0.20            | 0.919             | 0.168             | 0.383             | 0.294              | 0.121             | 0.239                | 0.211             |
| Uri-aldo             | -0.042          | 0.830             | 0.466             | 0.011             | -0.023             | 0.950             | 0.230                | 0.231             |
| Serum K <sup>+</sup> | 0.019           | 0.923             | -0.550            | 0.002             | 0.109              | 0.575             | -0.015               | 0.939             |
| Diameter             | -0.026          | 0.285             | 0.775             | 0.001             | -0.141             | 0.465             | 0.42                 | 0.012             |

Abbreviations: PAC, plasma aldosterone concentration; PRA, plasma renin activity; ARR, aldosterone-to-renin ratio; Uri-aldo, 24h urinary aldosterone; IRS, immunoreactivescore; V, volume.
